# Supplementary material for: The probable number of hydrogen-bonded contacts for chemical groups in organic crystal structuresElectronic supplementary information (ESI) available: details of the calculated properties of atoms and groups in Tables 1 and 2. See http://www.rsc.org/suppdata/cc/b4/b402939a/
Source: Royal Society of Chemistry journal article supplement (doi:10.1039/b402939a), 2004-01-01
Supplement: b402939a.doc [file b402939a.doc]

**Can we predict the number of hydrogen bond contacts for chemical groups in organic crystal structures?**

**L. Infantes and W.D.S. Motherwell**

**SUPPLEMENTARY INFORMATION**

**1. Preparation of data**

The CSD search was performed on version 5.26 (November 2002) to give 41096 reference codes for crystal structures. CSD entries for these structures were written to files in mol2 format, which preserves the bond-type information required for assignment of atom-types, and passed to the program RPluto. RPluto was modified to assign atom-type codes, using an extended list of existing internal code numbers which have the 5digit form nnmmm, where nn is a CSD code number for the element type e.g. N = 56, O=64, and mmm is a unique identifier for the type of environment of this element. The details of the codes do not matter as each can be referred to by a text-string identifier, e.g. ‘O C=O ketone’ 64710, ‘O C=O ester’ 64711, ‘O COOH acid’, 64791, ‘O water’, 64399, etc. In order to assign these codes correctly one requires ideally the CSD bond types (single, double, etc.) and the number of attached hydrogen atoms.

New code was written to assign every atom to a chemical group as defined in an input list. The method is simply to identify each group in terms of an atom centred fragment, where the first atom A is defined as connected to B, C, D, etc. Each atom has properties element-type, number-of-bonded-atoms and number-of-attached-hydrogens. These groups are thereafter identified by their row-number in an input control list, e.g. COOH is group 52. When there are several occurrences of the same group in a compound these are given a Group-count-code which records the count of the group e.g. if there were 3 COOH groups present the codes are 5201, 5202, 5203.

The positions of hydrogen atoms were normalised by command HNORM, using standard bond lengths, C-H 1.083, O-H 1.009, N-H 0.983 Å . When hydrogen 3D-coordinates are missing (as often occurs) the HCAL command in RPluto generated hydrogens in idealised calculated positions. When there is not a rigidly defined position for the H positions, e.g. water represented by an isolated O atom, we placed the H atoms in an arbitrary orientation but the correct H-O-H angle. The calculation of the sterically accessible surface was carried out by randomly moving a probe atom of radius 1.10 Å over the van der Waals surface of the atom in the molecule for a large number of points (8000) and noting the number of times that the probe intersected with any other atom in the same molecule, thus giving a percentage figure for the remaining accessible surface (AS), e.g. water O 0.50, O of hydroxyl 0.19-0.30, O of C=O, 0.29-0.40 , N of cyano 0.48-0.54 , etc. The command VATM performed the AS calculation on O, N, S, F, Cl, Br, I atoms.

The calculation of intermolecular contacts was carried out using a set of input contact radii, which are slightly larger than the van der Waals radii used in CSD Mercury. A contact is defined as an intermolecular distance less or equal to the sum of the radii for the atom pair. The command CALC INTER defines these radii. Note that these can include contacts which are not hydrogen bonds, e.g. C=O…O=C.

The actual RPluto command script used for batch processing is given as follows:

COMDEF BATCH NOLAB

BATMAX 200 10

HNORM

MVOL

HCAL ALL KEEP WATER

VATM O P=1.2 N=8000 NOCRYST NOPLOT

VATM N

VATM S

VATM F

VATM Cl

VATM Br

VATM I

CALC INTER O 1.57 N 1.61 S 1.85 F 1.52 Cl 1.80 Br 1.90 I 2.03

HBTOT

PLOT NEXT

The command HBTOT creates the output to several files of data, suitable for loading into the Access database. We excluded very large CSD structures with more than 200 atoms, or 10 unique molecular residues, as these caused computational problems, (command BATMAX). Full details are not appropriate here, but the important content is as follows:

File 1 *Compounds*  (properties of the complete structure)

Reference-code, number-donors, number-acceptors, space-group-symbol, space-group-number, Cell-volume.

File 2  *Residues* (properties of each molecular residue)

Reference-code, residue-number, number-donors, number-acceptors, molecular-weight, molecular-volume.

File 3 *Atoms*  (properties of each atom, excluding C, H)

Reference code, atom-label, atom-type-code, group-code, group-count-code, residue-number, accessible-surface.

File 4 *Contacts* (properties of each contact)

Reference code, atom-label, atom-label-contact, symmetry-operator-type, symmetry-operator-code, distance (Å).

As mentioned above, we calculated all intermolecular contacts for each atom, and in the total sample we can not always distinguish between a general non-bonded contact and a hydrogen bond, because of missing hydrogen atoms in some cases. In order to obtain a reliable classification of contacts into donor and acceptor hydrogen bonds, and non-hydrogen-bond contacts, we created a sub-database of 7141 reference codes containing only those structures with all hydrogen atoms present. We then counted the number of donor bonds and acceptor bonds for each atom, and produced an average value ND1 and NA1 for these values over this sample. The values given in Table 1 of the paper were calculated by counting the total number of contacts, NC, per atom in the total sample (41055) and dividing this in the ratio ND1:ND2 to give the average estimated donor-contacts, ND, and average acceptor-contacts, NA.

For the output files 1 & 2 we required an estimate of the potential number of donor and acceptor bonds per compound, and per molecular residue. These were calculated by summing the ND and NA values for all atoms. The donor/acceptor ratio is defined as a property of the structure and is RDA=ND/NA, summing over all atoms in each structure. The value <RDA> given in Table 2, refers to the average value of RDA over all the structures which contain the specified atom with the specified number of connections, e.g. for keto-O with exactly one connection, NC=1, we have 3396 occurrences of the atom, spread over 8600 structures. The value <RDA> is the average of RDA over these 3396 structures.

**2. Database *CSDContact* creation**

The files generated by RPluto were directly imported to Access, which are given the Access table names *Compounds, Residues, Atoms* and *Contacts* (an example of these tables for two structures is given in tables 3, 4, 5 and 6 respectively). We also imported 3 auxiliary tables as follows:

*AtomCode* defines the properties of 117 atom codes,

*GroupCode* defines the properties of 108 chemical groups,

*SymmetryOperatorCode* defines the properties of 15 types of symmetry operator.

Access is fundamentally a collection of tables linked together by defined fields, most notably the Reference-Code. There are extensive selection facilities, (a query language), provided in Access which makes it possible to select the required fields, manipulate and accumulate average values of selected fields. We have found the generation of information such as given in the examples for two typical CSD entries, AABHTZ, AADAMC, (Figure 2) to be efficient and entirely practical on a normal present day PC-Windows computer. The output from RPluto for these two entries is given in Tables 3- 6.

**3. Summary statistics**

A small number of CSD structures had to be removed from the final Access database due to obscure details of previously undetected disorder of atoms, or other errors. The final totals for the tables are *Compounds* 41055, *Residues* 71513, *Atoms* 304740, and *Contacts* 246323.

The entire contact database is contained in one Microsoft Access file, *CSDContact.mdb*, file size is approximately 132MB.

**Figure 2**. Structures for CSD reference codes: AABHTZ (left) and AADAMC (right).


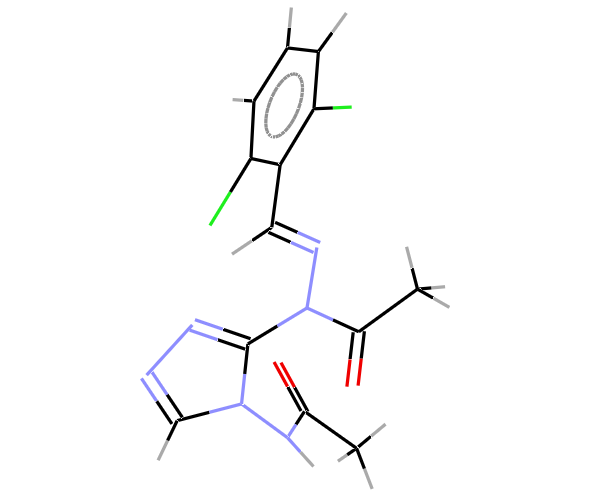

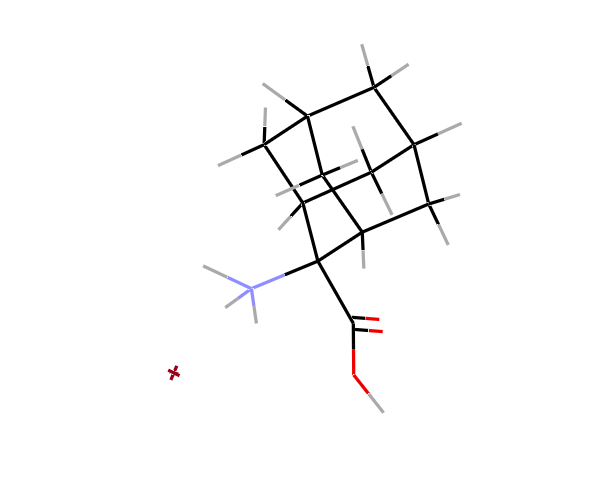


N1

O2

O1

Br1

N1

N2

N3

N4

N5

N6

O2

O1

Cl1

Cl2

**Table 3.** Example of two structures (AABHTZ and AADAMC) in the Compounds table.

Number Number Space Space

CSD of of Group Group Cell

Refcode Donor Acceptor Symbol Number Volume

AABHTZ 0.76 4.45 P-1 2 770.0

AADAMC 4.01 4.22 P21/c 14 1139.1

**Table 4**. Example of two structures (AABHTZ and AADAMC) in the *Residues* table.

Number Number

CSD Residue of of Molecular Molecular

Refcode Number Donor Acceptor Weight Volume

AABHTZ 1 0.76 4.45 355.2 275.1

AADAMC 1 0.00 2.52 79.9 26.5

AADAMC 2 4.01 1.7 196.3 185.4

**Table 5**. Example of two structures (AABHTZ and AADAMC) in the *Atoms* table.

Group

CSD Atom Atom Group Count Residue Available

Refcode Label Code Code Code Num Surface

AABHTZ Cl1 21100 103 10301 1 0.39

AABHTZ Cl2 21100 103 10302 1 0.40

AABHTZ N1 56200 90 9001 1 0.03

AABHTZ N2 56600 89 8901 1 0.01

AABHTZ N3 56200 67 6701 1 0.22

AABHTZ N4 56200 67 6701 1 0.30

AABHTZ N5 56000 89 8902 1 0

AABHTZ N6 56601 50 5001 1 0.03

AABHTZ O1 64740 50 5001 1 0.12

AABHTZ O2 64740 94 9401 1 0.31

AADAMC Br1 16000 21 2101 1 1.00

AADAMC N1 56403 74 7401 2 0

AADAMC O1 64391 52 5201 2 0.16

AADAMC O2 64791 52 5201 2 0.30

**Table 6**. Example of two structures (AABHTZ and AADAMC) in the *Contact* table.

Atom Symmetry Symmetry

CSD Atom Label Operator Operator Distance

Refcode Label Contact Type Code (Å)

AABHTZ Cl2 N3 7 2445 3.372

AABHTZ N3 Cl2 7 2445 3.372

AABHTZ N6 O2 7 2545 2.865

AABHTZ O1 O1 7 2555 3.069

AABHTZ O2 N6 7 2545 2.865

AADAMC Br1 N1 1 1564 3.291

AADAMC Br1 N1 7 3555 3.249

AADAMC Br1 O1 1 1664 3.138

AADAMC N1 Br1 1 1546 3.291

AADAMC N1 Br1 7 3555 3.249

AADAMC N1 O2 1 1655 3.084

AADAMC O1 Br1 1 1446 3.138

AADAMC O2 N1 1 1455 3.084
